# Supplementary material
Source: PubMed Central journal article supplement (PMC6479259)
Supplement: Supp_Table1.pdf [file Supp_Table1.pdf]

## Supplementary Data

SUPPLEMENTARY TABLE S1. LIST OF METABOLITES IDENTIFIED AND CHARACTERIZED BY LIQUID CHROMATOGRAPHY MASS SPECTROMETRY

| <i>No.</i> | <i>Metabolite</i>                  | <i>No.</i> | <i>Metabolite</i>                |
|------------|------------------------------------|------------|----------------------------------|
| 1          | (R)-3-Hydroxydecanoic acid         | 96         | Isovalerylglycine                |
| 2          | (R)-lipoic acid                    | 97         | Itaconic acid                    |
| 3          | 1-Methyladenosine                  | 98         | Kynurenic acid                   |
| 4          | 1-Methylhistidine                  | 99         | L-Acetylcarnitine                |
| 5          | 1-Methylnicotinamide               | 100        | L-Alanine                        |
| 6          | 2'-Deoxyguanosine 5'-monophosphate | 101        | L-Arginine                       |
| 7          | 2-Furoic acid                      | 102        | L-Asparagine                     |
| 8          | 2-Hydroxycaproic acid              | 103        | L-Aspartic acid                  |
| 9          | 2-Hydroxyvaleric acid              | 104        | L-Carnitine                      |
| 10         | 2-Isopropyl-3-oxosuccinate         | 105        | L-Cystathionine                  |
| 11         | 2-Isopropylmalic acid              | 106        | L-Dihydroroctic acid             |
| 12         | 2-Ketobutyric acid                 | 107        | L-Glutamic acid                  |
| 13         | 2-Ketohexanoic acid                | 108        | L-Glutamine                      |
| 14         | 2-Pyrocatechuic acid               | 109        | L-Histidine                      |
| 15         | 3-hydroxyhexadecanoic acid         | 110        | L-Histidinol                     |
| 16         | 3-Hydroxymethylglutaric acid       | 111        | L-Isoleucine                     |
| 17         | 4-Acetamidobutanoic acid           | 112        | L-Kynurenine                     |
| 18         | 4-Hydroxybenzaldehyde              | 113        | L-Lactic acid                    |
| 19         | 4-Hydroxybutyric acid              | 114        | L-Leucine                        |
| 20         | 4-Pyridoxic acid                   | 115        | L-Lysine                         |
| 21         | 5-Methoxytryptophan                | 116        | L-Methionine                     |
| 22         | 5-Methyltetrahydrofolic acid       | 117        | L-Phenylalanine                  |
| 23         | 5'-Methylthioadenosine             | 118        | L-Proline                        |
| 24         | Acetylcholine                      | 119        | L-Serine                         |
| 25         | Acetylcysteine                     | 120        | L-Threonine                      |
| 26         | Acetylphosphate                    | 121        | L-Tryptophan                     |
| 27         | Adenine                            | 122        | L-Tyrosine                       |
| 28         | Adenosine                          | 123        | L-Valine                         |
| 29         | Adenosine monophosphate            | 124        | Maleic acid                      |
| 30         | ADP                                | 125        | Malic acid                       |
| 31         | ADP-glucose                        | 126        | Mannitol                         |
| 32         | Allantoin                          | 127        | Methionine sulfoxide             |
| 33         | Aminoadipic acid                   | 128        | Methylacetoacetic acid           |
| 34         | Arecoline                          | 129        | Methylimidazoleacetic acid       |
| 35         | Argininosuccinic acid              | 130        | N6-Acetyl-L-lysine               |
| 36         | Ascorbic acid                      | 131        | N-Acetylasparagine               |
| 37         | Asymmetric dimethylarginine        | 132        | N-Acetylaspartylglutamic acid    |
| 38         | Beta-D-Glucopyranuronic acid       | 133        | N-Acetyl-D-glucosamine           |
| 39         | Betaine                            | 134        | N-Acetyl-glucosamine 1-phosphate |
| 40         | Betaine aldehyde                   | 135        | N-Acetylglutamic acid            |
| 41         | Caprylic acid                      | 136        | N-Acetylglutamine                |
| 42         | Carnosine                          | 137        | N-Acetyl-L-alanine               |
| 43         | CDP-Ethanolamine                   | 138        | N-Acetyl-L-aspartic acid         |
| 44         | Choline                            | 139        | N-Acetyl-L-methionine            |
| 45         | Citicoline                         | 140        | N-Acetylmethionine               |
| 46         | Citric acid                        | 141        | N-Acetylputrescine               |
| 47         | Citrulline                         | 142        | NAD                              |
| 48         | Creatine                           | 143        | NADP                             |
| 49         | Creatinine                         | 144        | N-Formyl-L-methionine            |
| 50         | Cytidine                           | 145        | Niacinamide                      |
| 51         | Cytidine monophosphate             | 146        | Nicotinic acid                   |
| 52         | Cytosine                           | 147        | Ornithine                        |
| 53         | D-2-Hydroxyglutaric acid           | 148        | Orotic acid                      |
| 54         | D-Arabitol                         | 149        | Orotidine                        |

(continued)

SUPPLEMENTARY TABLE S1. (CONTINUED)

| <i>No.</i> | <i>Metabolite</i>           | <i>No.</i> | <i>Metabolite</i>                       |
|------------|-----------------------------|------------|-----------------------------------------|
| 55         | Deoxyadenosine              | 150        | Oxalacetic acid                         |
| 56         | Deoxyribose 5-phosphate     | 151        | Oxidized glutathione (GSSG)             |
| 57         | Deoxyuridine                | 152        | Oxoglutaric acid                        |
| 58         | D-Fructose                  | 153        | Pantothenic acid                        |
| 59         | D-Glucose                   | 154        | Phenylacetylglycine                     |
| 60         | Dihydroxyacetone phosphate  | 155        | Phenyllactic acid                       |
| 61         | Dimethylglycine             | 156        | Phenylpyruvic acid                      |
| 62         | DL-2-Aminoheptanoic acid    | 157        | Phosphoenolpyruvic acid                 |
| 63         | D-Ribose                    | 158        | Phosphorylcholine                       |
| 64         | D-Ribose 5-phosphate        | 159        | Pipecolic acid                          |
| 65         | D-Sedoheptulose 7-phosphate | 160        | Proline betaine                         |
| 66         | Ecgonine                    | 161        | Propionylcarnitine                      |
| 67         | Fructose 6-phosphate        | 162        | Putrescine                              |
| 68         | GDP-glucose                 | 163        | Pyridoxamine                            |
| 69         | Gluconic acid               | 164        | Pyridoxine                              |
| 70         | Gluconolactone              | 165        | Pyroglutamic acid                       |
| 71         | Glucosamine 6-phosphate     | 166        | Pyruvic acid                            |
| 72         | Glucose 1-phosphate         | 167        | Quinolinic acid                         |
| 73         | Glucose 6-phosphate         | 168        | S-Adenosylhomocysteine                  |
| 74         | Glutathione reduced (GSH)   | 169        | S-Adenosylmethionine                    |
| 75         | Glycerol 3-phosphate        | 170        | Salicylic acid                          |
| 76         | Glycerophosphocholine       | 171        | Spermidine                              |
| 77         | Glycine                     | 172        | Succinic acid                           |
| 78         | Glycolic acid               | 173        | Taurine                                 |
| 79         | Glyoxylic acid              | 174        | Thiamine                                |
| 80         | Guanidoacetic acid          | 175        | Thiamine monophosphate                  |
| 81         | Guanine                     | 176        | Threonic acid                           |
| 82         | Guanosine                   | 177        | Thymidine                               |
| 83         | Guanosine diphosphate       | 178        | trans-Aconitic acid                     |
| 84         | Hexanoylcarnitine           | 179        | Uracil                                  |
| 85         | Hippuric acid               | 180        | Ureidosuccinic acid                     |
| 86         | Hydrocinnamic acid          | 181        | Uric acid                               |
| 87         | Hypotaurine                 | 182        | Uridine                                 |
| 88         | Hypoxanthine                | 183        | Uridine 5'-monophosphate                |
| 89         | Imidazoleacetic acid        | 184        | Uridine diphosphate glucuronic acid     |
| 90         | Imidazolelactic acid        | 185        | Uridine diphosphategalactose            |
| 91         | Indole-3-carboxylic acid    | 186        | Uridine diphosphate-N-acetylglucosamine |
| 92         | Indolelactic acid           | 187        | Urocanic acid                           |
| 93         | Inosine                     | 188        | Vanillin                                |
| 94         | Inosinic acid               | 189        | Xanthine                                |
| 95         | Inositol                    | 190        | Xanthosine                              |

Metabolites significantly altered in the ipsilateral hemisphere after traumatic brain injury (untreated) when compared with sham are highlighted. Metabolites decreased (light gray) and increased (dark gray).
